# Supplementary material
Source: PubMed Central journal article supplement (PMC3008357)
Supplement: NIHMS253286-supplement-Supp_Table_2.pdf [file NIHMS253286-supplement-Supp_Table_2.pdf]

Supplementary Table 2

| #  | Annotation                                        | ln(Bayes factor) | p value     | Genes                                                                                                                                                                                                                                                                             |
|----|---------------------------------------------------|------------------|-------------|-----------------------------------------------------------------------------------------------------------------------------------------------------------------------------------------------------------------------------------------------------------------------------------|
| 1  | GO:0006412 [6]: protein biosynthesis              | 31.81            | 1.40906E-05 | EIF2B2 MKNK1 MRPL16 MRPL30 MRPL48 MRPS25 RPL10A RPL12 RPL15 RPL18 RPL26 RPL26L1 RPL31 RPL35 RPL36 RPL37 RPL39L RPL7A RPS10 RPS17 RPS3                                                                                                                                             |
| 2  | GO:0009059 [5]: macromolecule biosynthesis        | 29.61            | 1.40906E-05 | EIF2B2 MKNK1 MRPL16 MRPL30 MRPL48 MRPS25 RPL10A RPL12 RPL15 RPL18 RPL26 RPL26L1 RPL31 RPL35 RPL36 RPL37 RPL39L RPL7A RPS10 RPS17 RPS3                                                                                                                                             |
| 3  | GO:0044249 [5]: cellular biosynthesis             | 22.82            | 1.40906E-05 | EIF2B2 MKNK1 MRPL16 MRPL30 MRPL48 MRPS25 QTRT1 RPL10A RPL12 RPL15 RPL18 RPL26 RPL26L1 RPL31 RPL35 RPL36 RPL37 RPL39L RPL7A RPS10 RPS17 RPS3                                                                                                                                       |
| 4  | GO:0009058 [4]: biosynthesis                      | 21.89            | 1.40906E-05 | EIF2B2 MKNK1 MRPL16 MRPL30 MRPL48 MRPS25 QTRT1 RPL10A RPL12 RPL15 RPL18 RPL26 RPL26L1 RPL31 RPL35 RPL36 RPL37 RPL39L RPL7A RPS10 RPS17 RPS3                                                                                                                                       |
| 5  | GO:0043170 [4]: macromolecule metabolism          | 9.99             | 1.40906E-05 | CLPX EIF2B2 LIPT1 MKNK1 MRPL16 MRPL30 MRPL48 MRPS25 PTPN1 RNF130 RPL10A RPL12 RPL15 RPL18 RPL26 RPL26L1 RPL31 RPL35 RPL36 RPL37 RPL39L RPL7A RPS10 RPS17 RPS3 SPAM1 TALDO1 UBE2V1 ZNF313                                                                                          |
| 6  | GO:0044267 [6]: cellular protein metabolism       | 9.76             | 1.40906E-05 | CLPX EIF2B2 LIPT1 MKNK1 MRPL16 MRPL30 MRPL48 MRPS25 PTPN1 RNF130 RPL10A RPL12 RPL15 RPL18 RPL26 RPL26L1 RPL31 RPL35 RPL36 RPL37 RPL39L RPL7A RPS10 RPS17 RPS3 UBE2V1 ZNF313                                                                                                       |
| 7  | GO:0044260 [5]: cellular macromolecule metabolism | 9.73             | 1.40906E-05 | CLPX EIF2B2 LIPT1 MKNK1 MRPL16 MRPL30 MRPL48 MRPS25 PTPN1 RNF130 RPL10A RPL12 RPL15 RPL18 RPL26 RPL26L1 RPL31 RPL35 RPL36 RPL37 RPL39L RPL7A RPS10 RPS17 RPS3 TALDO1 UBE2V1 ZNF313                                                                                                |
| 8  | GO:0019538 [5]: protein metabolism                | 9.62             | 1.40906E-05 | CLPX EIF2B2 LIPT1 MKNK1 MRPL16 MRPL30 MRPL48 MRPS25 PTPN1 RNF130 RPL10A RPL12 RPL15 RPL18 RPL26 RPL26L1 RPL31 RPL35 RPL36 RPL37 RPL39L RPL7A RPS10 RPS17 RPS3 UBE2V1 ZNF313                                                                                                       |
| 9  | GO:0008152 [3]: metabolism                        | 9.51             | 1.40906E-05 | CLPX DFFA EIF2B2 G3BP LIPT1 MAOA MGC15763 MGC4172 MKNK1 MNDA MRPL16 MRPL30 MRPL48 MRPS25 PHF3 PRDX2 PSPC1 PTPN1 QTRT1 RNF130 RNMTL1 RPL10A RPL12 RPL15 RPL18 RPL26 RPL26L1 RPL31 RPL35 RPL36 RPL37 RPL39L RPL7A RPS10 RPS17 RPS3 SPAM1 TALDO1 TFAM TOP3A TTF1 U2AF1 UBE2V1 ZNF313 |
| 10 | GO:0044237 [4]: cellular metabolism               | 8.43             | 1.40906E-05 | CLPX DFFA EIF2B2 G3BP LIPT1 MAOA MGC15763 MKNK1 MNDA MRPL16 MRPL30 MRPL48 MRPS25 PHF3 PRDX2 PSPC1 PTPN1 QTRT1 RNF130 RNMTL1 RPL10A RPL12 RPL15 RPL18 RPL26 RPL26L1 RPL31 RPL35 RPL36 RPL37 RPL39L RPL7A RPS10 RPS17 RPS3 TALDO1 TFAM TOP3A TTF1 U2AF1 UBE2V1 ZNF313               |

|    |                                                                 |      |             |                                                                                                                                                                                                                                                                                                                                                  |
|----|-----------------------------------------------------------------|------|-------------|--------------------------------------------------------------------------------------------------------------------------------------------------------------------------------------------------------------------------------------------------------------------------------------------------------------------------------------------------|
| 11 | GO:0044238 [4]: primary metabolism                              | 8.37 | 1.40906E-05 | CLPX DFFA EIF2B2 G3BP LIPT1 MAOA<br>MKNK1 MNDA MRPL16 MRPL30<br>MRPL48 MRPS25 PHF3 PSPC1 PTPN1<br>QTRT1 RNF130 RNMTL1 RPL10A<br>RPL12 RPL15 RPL18 RPL26 RPL26L1<br>RPL31 RPL35 RPL36 RPL37 RPL39L<br>RPL7A RPS10 RPS17 RPS3 SPAM1<br>TALDO1 TFAM TOP3A TTF1 U2AF1<br>UBE2V1 ZNF313                                                               |
| 12 | GO:0007582 [2]: physiological process                           | 1.94 | 0.005407329 | ARRB1 C1QBP CLPX DFFA EIF2B2<br>G3BP LIPT1 MAOA MGC15763<br>MGC4172 MKNK1 MNDA MRPL16<br>MRPL30 MRPL48 MRPS25 PHF3<br>PRDX2 PSPC1 PTPN1 QTRT1 RAB5A<br>RNF130 RNMTL1 RPL10A RPL12<br>RPL15 RPL18 RPL26 RPL26L1 RPL31<br>RPL35 RPL36 RPL37 RPL39L RPL7A<br>RPS10 RPS17 RPS3 SLC25A5 SMC1L2<br>SPAM1 TALDO1 TFAM TOP3A TTF1<br>U2AF1 UBE2V1 ZNF313 |
| 13 | GO:0050875 [3]: cellular physiological process                  | 1.78 | 0.00634556  | CLPX DFFA EIF2B2 G3BP LIPT1 MAOA<br>MGC15763 MKNK1 MNDA MRPL16<br>MRPL30 MRPL48 MRPS25 PHF3<br>PRDX2 PSPC1 PTPN1 QTRT1 RAB5A<br>RNF130 RNMTL1 RPL10A RPL12<br>RPL15 RPL18 RPL26 RPL26L1 RPL31<br>RPL35 RPL36 RPL37 RPL39L RPL7A<br>RPS10 RPS17 RPS3 SLC25A5 SMC1L2<br>TALDO1 TFAM TOP3A TTF1 U2AF1<br>UBE2V1 ZNF313                              |
| 14 | GO:0042451 [7]: purine nucleoside biosynthesis                  | 0.89 | 0.014846368 | QTRT1                                                                                                                                                                                                                                                                                                                                            |
| 15 | GO:0042455 [7]: ribonucleoside biosynthesis                     | 0.89 | 0.014846368 | QTRT1                                                                                                                                                                                                                                                                                                                                            |
| 16 | GO:0046114 [9]: guanosine biosynthesis                          | 0.89 | 0.014846368 | QTRT1                                                                                                                                                                                                                                                                                                                                            |
| 17 | GO:0046116 [11]: queuosine metabolism                           | 0.89 | 0.014846368 | QTRT1                                                                                                                                                                                                                                                                                                                                            |
| 18 | GO:0046118 [10]: 7-methylguanosine biosynthesis                 | 0.89 | 0.014846368 | QTRT1                                                                                                                                                                                                                                                                                                                                            |
| 19 | GO:0046129 [8]: purine ribonucleoside biosynthesis              | 0.89 | 0.014846368 | QTRT1                                                                                                                                                                                                                                                                                                                                            |
| 20 | GO:0006390 [8]: transcription from mitochondrial promoter       | 0.89 | 0.014846368 | TFAM                                                                                                                                                                                                                                                                                                                                             |
| 21 | GO:0008616 [8]: queuosine biosynthesis                          | 0.89 | 0.014846368 | QTRT1                                                                                                                                                                                                                                                                                                                                            |
| 22 | GO:0008618 [10]: 7-methylguanosine metabolism                   | 0.89 | 0.014846368 | QTRT1                                                                                                                                                                                                                                                                                                                                            |
| 23 | GO:0009163 [6]: nucleoside biosynthesis                         | 0.89 | 0.014846368 | QTRT1                                                                                                                                                                                                                                                                                                                                            |
| 24 | GO:0006356 [8]: regulation of transcription from Pol I promoter | 0.49 | 0.021927801 | TFAM                                                                                                                                                                                                                                                                                                                                             |
| 25 | GO:0008617 [9]: guanosine metabolism                            | 0.49 | 0.021927801 | QTRT1                                                                                                                                                                                                                                                                                                                                            |
| 26 | GO:0006396 [6]: RNA processing                                  | 0.42 | 0.023052063 | G3BP PSPC1 QTRT1 RNMTL1 U2AF1                                                                                                                                                                                                                                                                                                                    |
| 27 | GO:0007126 [8]: meiosis                                         | 0.37 | 0.024723526 | SMC1L2 TOP3A                                                                                                                                                                                                                                                                                                                                     |
