# Supplementary material
Source: PubMed Central journal article supplement (PMC3008357)
Supplement: NIHMS253286-supplement-Supp_Table_3.pdf [file NIHMS253286-supplement-Supp_Table_3.pdf]

Supplementary Table 3

| <b>Metabolism/<br/>Mitochondria Pathway</b>        | <b>Glycolysis</b>      | <b>Pentose Phosphate<br/>Pathway</b> | <b>TCA Cycle</b>       | <b>PGC1<math>\alpha</math></b> | <b>Ribosomal Proteins</b> |
|----------------------------------------------------|------------------------|--------------------------------------|------------------------|--------------------------------|---------------------------|
| Spearman r                                         | 0.2246                 | 0.165                                | -0.01053               | 0.407                          | 0.3228                    |
| 95% confidence interval                            | -0.2693 to 0.6249      | -0.3258 to 0.5857                    | -0.4739 to 0.4574      | -0.07244 to 0.7337             | -0.1682 to 0.6855         |
| P value (two-tailed)                               | 0.3553                 | 0.4997                               | 0.9659                 | 0.0837                         | 0.1777                    |
| Approximation                                      | Gaussian Approximation | Gaussian Approximation               | Gaussian Approximation | Gaussian Approximation         | Gaussian Approximation    |
| Is the correlation<br>significant?<br>(alpha=0.05) | No                     | No                                   | No                     | No                             | No                        |
